# Supplementary material
Source: ML conference proceedings conference paper supplement (https://openreview.net/forum?id=mdYvaTs4gr)
Supplement: supplementary_material [file attachment]

## A PROOFS

In this section, we provide proofs of theorems stated in Section 6. Recall from Section 3 that  $\iota = \text{polylog}(|\mathcal{S}|, (1 - \gamma)^{-1}, N)$  is some constant. Our proofs rely on the following lemma, which bounds the estimation error due to using the empirical Bellman operator:

**Lemma A.1.** *For all state-action  $(\mathbf{s}, \mathbf{a}) \in \mathcal{S} \times \mathcal{A}$  such that  $n(\mathbf{s}, \mathbf{a}) \geq 1$ , function  $Q$ , and  $\delta \in (0, 1)$ , we have:*

$$\mathbb{P} \left( \left| \hat{\mathcal{B}}^* Q(\mathbf{s}, \mathbf{a}) - \mathcal{B}^* Q(\mathbf{s}, \mathbf{a}) \right| \leq \sqrt{\frac{\iota \log(1/\delta)}{n(\mathbf{s}, \mathbf{a})}} \right) \geq 1 - \delta.$$

The above lemma is a well-known result in reinforcement learning (Rashidinejad et al., 2021), whose derivation follows from Hoeffding’s inequalities.

### A.1 PROOF OF THEOREM 6.1

Without loss of generality, assume that  $\delta_1, \delta_2 \leq \delta$  are the solution to the outer maximization of Equation 4 at convergence. Using Lemma A.1, we have that

$$\begin{aligned} \hat{Q}(\mathbf{s}, \mathbf{a}, \delta) &= \hat{\mathcal{B}}^* \hat{Q}(\mathbf{s}, \mathbf{a}, \delta_2) - \alpha \sqrt{\frac{\log(1/\delta_1)}{n(\mathbf{s}, \mathbf{a}) \wedge 1}} \\ &\leq \mathcal{B}^* \hat{Q}(\mathbf{s}, \mathbf{a}, \delta_2) - \alpha \sqrt{\frac{\log(1/\delta_1)}{n(\mathbf{s}, \mathbf{a}) \wedge 1}} + \sqrt{\frac{\iota \log(1/\delta_1)}{n(\mathbf{s}, \mathbf{a})}} \leq \mathcal{B}^* \hat{Q}(\mathbf{s}, \mathbf{a}, \delta_2) \quad \forall \mathbf{s} \in \mathcal{S}, \mathbf{a} \in \mathcal{A}, \end{aligned}$$

holds with probability at least  $1 - \delta_1$  for any  $\alpha \geq \iota^{1/2}$ . Using Lemma 6.1, we have

$$\begin{aligned} \hat{Q}(\mathbf{s}, \mathbf{a}, \delta) \leq \mathcal{B}^* \hat{Q}(\mathbf{s}, \mathbf{a}, \delta) &\implies \hat{Q} \leq (I - \gamma P^*)^{-1} R \\ &\implies \hat{Q}(\mathbf{s}, \mathbf{a}) \leq Q^*(\mathbf{s}, \mathbf{a}) \quad \forall \mathbf{s} \in \mathcal{S}, \mathbf{a} \in \mathcal{A}, \end{aligned}$$

holds with probability at least  $1 - \delta_1 \geq 1 - \delta$ , as desired.

### A.2 PROOF OF THEOREM 6.2

Recall from Equation 5 that at convergence, we have,

$$\begin{aligned} \hat{Q}(\mathbf{s}, \mathbf{a}, \delta) &= \arg \min_Q \max_{\delta_1, \delta_2} \max_{\pi} \alpha \sqrt{\frac{\log(1/\delta_1)}{(n(\mathbf{s}) \wedge 1)}} (\mathbb{E}_{\mathbf{s} \sim D, \mathbf{a} \sim \pi(\mathbf{a}|\mathbf{s})} [Q(\mathbf{s}, \mathbf{a}, \delta)] - \mathbb{E}_{\mathbf{s}, \mathbf{a} \sim D} [Q(\mathbf{s}, \mathbf{a}, \delta)]) \\ &\quad + \frac{1}{2} \mathbb{E}_{\mathbf{s}, \mathbf{a}, \mathbf{s}' \sim D} \left[ \left( Q(\mathbf{s}, \mathbf{a}, \delta) - \hat{\mathcal{B}}^* \hat{Q}(\mathbf{s}, \mathbf{a}, \delta_2) \right)^2 \right] + \mathcal{R}(\pi) \\ &\leq \max_{\delta_1, \delta_2} \max_{\pi} \arg \min_Q \alpha \sqrt{\frac{\log(1/\delta_1)}{(n(\mathbf{s}) \wedge 1)}} (\mathbb{E}_{\mathbf{s} \sim D, \mathbf{a} \sim \pi(\mathbf{a}|\mathbf{s})} [Q(\mathbf{s}, \mathbf{a}, \delta)] - \mathbb{E}_{\mathbf{s}, \mathbf{a} \sim D} [Q(\mathbf{s}, \mathbf{a}, \delta)]) \\ &\quad + \frac{1}{2} \mathbb{E}_{\mathbf{s}, \mathbf{a}, \mathbf{s}' \sim D} \left[ \left( Q(\mathbf{s}, \mathbf{a}, \delta) - \hat{\mathcal{B}}^* \hat{Q}(\mathbf{s}, \mathbf{a}, \delta_2) \right)^2 \right] + \mathcal{R}(\pi) \end{aligned}$$

For any  $\delta_1, \delta_2 \leq \delta$  and  $\pi$ , we have that the solution to the inner-minimization over  $Q$  yields

$$\begin{aligned} \tilde{Q}(\mathbf{s}, \mathbf{a}, \delta, \delta_1, \delta_2, \pi) &= \arg \min_Q \alpha \sqrt{\frac{\log(1/\delta_1)}{(n(\mathbf{s}) \wedge 1)}} (\mathbb{E}_{\mathbf{s} \sim D, \mathbf{a} \sim \pi(\mathbf{a}|\mathbf{s})} [Q(\mathbf{s}, \mathbf{a}, \delta)] - \mathbb{E}_{\mathbf{s}, \mathbf{a} \sim D} [Q(\mathbf{s}, \mathbf{a}, \delta)]) \\ &\quad + \frac{1}{2} \mathbb{E}_{\mathbf{s}, \mathbf{a}, \mathbf{s}' \sim D} \left[ \left( Q(\mathbf{s}, \mathbf{a}, \delta) - \hat{\mathcal{B}}^* \hat{Q}(\mathbf{s}, \mathbf{a}, \delta_2) \right)^2 \right] \\ &\leq \hat{\mathcal{B}}^* \hat{Q}(\mathbf{s}, \mathbf{a}, \delta_2) - \alpha \sqrt{\frac{\log(1/\delta_1)}{n(\mathbf{s})}} \left[ \frac{\pi(\mathbf{a} | \mathbf{s})}{\pi_{\beta}(\mathbf{a} | \mathbf{s})} - 1 \right]. \end{aligned}$$

This arises from taking the derivative of the minimization objective, and solving for  $Q$  that makes the derivative equal to 0. Note that we can simplify

$$\begin{aligned}\alpha \sqrt{\frac{\log(1/\delta_1)}{n(\mathbf{s})}} \left[ \frac{\pi(\mathbf{a} | \mathbf{s})}{\pi_\beta(\mathbf{a} | \mathbf{s})} - 1 \right] &= \alpha \sqrt{\frac{\log(1/\delta_1)}{n(\mathbf{s})}} \left[ \frac{\pi(\mathbf{a} | \mathbf{s}) - \pi_\beta(\mathbf{a} | \mathbf{s})}{\pi_\beta(\mathbf{a} | \mathbf{s})} \right] \\ &= \alpha \sqrt{\frac{\log(1/\delta_1)}{n(\mathbf{s}, \mathbf{a})}} \left[ \frac{\pi(\mathbf{a} | \mathbf{s}) - \pi_\beta(\mathbf{a} | \mathbf{s})}{\sqrt{\pi_\beta(\mathbf{a} | \mathbf{s})}} \right].\end{aligned}$$

Without loss of generality, assume that  $\delta_1, \delta_2 \leq \delta$  and  $\pi$  are the solution to the outer-maximization. Substituting the previous result into the equation for  $\hat{Q}(\mathbf{s}, \mathbf{a}, \delta)$ , and applying Lemma A.1 yields,

$$\begin{aligned}\hat{Q}(\mathbf{s}, \mathbf{a}, \delta) &\leq \hat{\mathcal{B}}^* \hat{Q}(\mathbf{s}, \mathbf{a}, \delta_2) - \alpha \sqrt{\frac{\log(1/\delta_1)}{n(\mathbf{s}, \mathbf{a})}} \left[ \frac{\pi(\mathbf{a} | \mathbf{s}) - \pi_\beta(\mathbf{a} | \mathbf{s})}{\sqrt{\pi_\beta(\mathbf{a} | \mathbf{s})}} \right] \\ &\leq \hat{\mathcal{B}}^* \hat{Q}(\mathbf{s}, \mathbf{a}, \delta_2) - \alpha \sqrt{\frac{\log(1/\delta_1)}{n(\mathbf{s}, \mathbf{a})}} \left[ \frac{\pi(\mathbf{a} | \mathbf{s}) - \pi_\beta(\mathbf{a} | \mathbf{s})}{\sqrt{\pi_\beta(\mathbf{a} | \mathbf{s})}} \right] + \sqrt{\frac{\iota \log(1/\delta_1)}{n(\mathbf{s}, \mathbf{a})}}.\end{aligned}$$

Note that the middle term is not positive if  $\pi(\mathbf{a} | \mathbf{s}) < \pi_\beta(\mathbf{a} | \mathbf{s})$ . However, we know that for  $\mathbf{a}^* = \arg \max_{\mathbf{a}} \hat{Q}(\mathbf{s}, \mathbf{a}, \delta)$  then  $\pi(\mathbf{a}^* | \mathbf{s}) \geq \pi_\beta(\mathbf{a}^* | \mathbf{s})$  by definition of  $\pi$  maximizing the learned Q-values. Therefore, we have

$$\begin{aligned}\hat{V}(\mathbf{s}, \delta) = \hat{Q}(\mathbf{s}, \mathbf{a}^*, \delta) &\leq \hat{\mathcal{B}}^* \hat{Q}(\mathbf{s}, \mathbf{a}^*, \delta_2) - \alpha \sqrt{\frac{\log(1/\delta_1)}{n(\mathbf{s}, \mathbf{a}^*)}} \left[ \frac{\pi(\mathbf{a}^* | \mathbf{s}) - \pi_\beta(\mathbf{a}^* | \mathbf{s})}{\sqrt{\pi_\beta(\mathbf{a}^* | \mathbf{s})}} \right] + \sqrt{\frac{\iota \log(1/\delta_1)}{n(\mathbf{s}, \mathbf{a}^*)}} \\ &\leq \hat{\mathcal{B}}^* \hat{V}(\mathbf{s}, \delta_2) \quad \forall \mathbf{s} \in \mathcal{S}\end{aligned}$$

holds with probability at least  $1 - \delta_1$  for  $\alpha$  satisfying

$$\alpha \geq \iota^{1/2} \max_{\mathbf{s}, \mathbf{a}} \left[ \frac{\pi(\mathbf{a} | \mathbf{s}) - \pi_\beta(\mathbf{a} | \mathbf{s})}{\sqrt{\pi_\beta(\mathbf{a} | \mathbf{s})}} \right]^{-1}.$$

Then, using Lemma A.1, we have

$$\hat{V}(\mathbf{s}, \delta) \leq \hat{\mathcal{B}}^* \hat{V}(\mathbf{s}, \delta) \implies \hat{V}(\mathbf{s}, \delta) \leq V^*(\mathbf{s}) \quad \forall \mathbf{s} \in \mathcal{S},$$

holds with probability at least  $1 - \delta_1 \geq 1 - \delta$ , as desired.

## B ATARI RESULTS

In this section, we provide per-game results across all Atari games that we evaluated on for the three considered dataset sizes. As mentioned in the main paper, we use the hyperparameter configuration detailed in [Kumar et al. \(2022\)](#) for our Atari experiments. For completion, we also reproduce the table in this section.

Table 3: Hyperparameters used by the offline RL Atari agents in our experiments. We follow the setup of [Agarwal et al. \(2020\)](#); [Kumar et al. \(2022\)](#).

| Hyperparameter                           | Setting (for both variations)        |
|------------------------------------------|--------------------------------------|
| Sticky actions                           | Yes                                  |
| Sticky action probability                | 0.25                                 |
| Grey-scaling                             | True                                 |
| Observation down-sampling                | (84, 84)                             |
| Frames stacked                           | 4                                    |
| Frame skip (Action repetitions)          | 4                                    |
| Reward clipping                          | [-1, 1]                              |
| Terminal condition                       | Game Over                            |
| Max frames per episode                   | 108K                                 |
| Discount factor                          | 0.99                                 |
| Mini-batch size                          | 32                                   |
| Target network update period             | every 2000 updates                   |
| Training environment steps per iteration | 250K                                 |
| Update period every                      | 4 environment steps                  |
| Evaluation $\epsilon$                    | 0.001                                |
| Evaluation steps per iteration           | 125K                                 |
| $Q$ -network: channels                   | 32, 64, 64                           |
| $Q$ -network: filter size                | $8 \times 8, 4 \times 4, 3 \times 3$ |
| $Q$ -network: stride                     | 4, 2, 1                              |
| $Q$ -network: hidden units               | 512                                  |

| Game          | REM                 | CQL                  | AEVL                | Fixed-CCVL           | CCVL                  |
|---------------|---------------------|----------------------|---------------------|----------------------|-----------------------|
| Asterix       | 405.7 $\pm$ 46.5    | 821.4 $\pm$ 75.1     | 421.2 $\pm$ 67.8    | 874.0 $\pm$ 64.3     | 1032.1 $\pm$ 86.7     |
| Breakout      | 14.3 $\pm$ 2.8      | 32.0 $\pm$ 3.2       | 7.4 $\pm$ 1.9       | 28.7 $\pm$ 2.8       | 31.2 $\pm$ 4.3        |
| Pong          | -7.7 $\pm$ 6.3      | 14.2 $\pm$ 3.3       | -8.4 $\pm$ 6.8      | 14.7 $\pm$ 3.8       | 15.8 $\pm$ 4.4        |
| Seaquest      | 293.3 $\pm$ 191.5   | 446.6 $\pm$ 26.9     | 320.6 $\pm$ 154.1   | 422.0 $\pm$ 21.9     | 551.2 $\pm$ 42.2      |
| Qbert         | 436.3 $\pm$ 111.5   | 9162.7 $\pm$ 993.6   | 294.6 $\pm$ 100.3   | 9172.3 $\pm$ 907.6   | 9170.1 $\pm$ 1023.5   |
| SpaceInvaders | 206.6 $\pm$ 77.6    | 351.9 $\pm$ 77.1     | 224.2 $\pm$ 84.7    | 355.7 $\pm$ 80.2     | 355.4 $\pm$ 81.1      |
| Zaxxon        | 2596.4 $\pm$ 1726.4 | 1757.4 $\pm$ 879.4   | 2467.8 $\pm$ 2023.4 | 1747.6 $\pm$ 894.3   | 2273.6 $\pm$ 1803.1   |
| YarsRevenge   | 5480.2 $\pm$ 962.3  | 16011.3 $\pm$ 1409.0 | 4857.1 $\pm$ 1012.6 | 15890.7 $\pm$ 1218.2 | 20140.5 $\pm$ 2022.8  |
| RoadRunner    | 3872.9 $\pm$ 1616.4 | 24928.7 $\pm$ 7484.5 | 5048.3 $\pm$ 2156.5 | 22590.3 $\pm$ 6860.2 | 26780.5 $\pm$ 10112.3 |
| MsPacman      | 1275.1 $\pm$ 345.6  | 2245.7 $\pm$ 193.8   | 1164.7 $\pm$ 508.2  | 2542.3 $\pm$ 188.4   | 2673.2 $\pm$ 226.4    |
| BeamRider     | 522.9 $\pm$ 42.2    | 617.9 $\pm$ 25.1     | 600.1 $\pm$ 57.3    | 645.3 $\pm$ 40.1     | 630.2 $\pm$ 37.8      |
| Jamesbond     | 157.6 $\pm$ 65.0    | 460.5 $\pm$ 102.0    | 114.3 $\pm$ 56.7    | 462.1 $\pm$ 98.4     | 452.1 $\pm$ 153.9     |
| Enduro        | 132.4 $\pm$ 16.1    | 253.5 $\pm$ 14.2     | 103.2 $\pm$ 10.1    | 244.8 $\pm$ 20.9     | 274.5 $\pm$ 23.8      |
| WizardOfWor   | 1663.7 $\pm$ 417.8  | 904.6 $\pm$ 343.7    | 1640.7 $\pm$ 383.4  | 1488.1 $\pm$ 450.9   | 1513.8 $\pm$ 652.1    |
| IceHockey     | -9.1 $\pm$ 5.1      | -7.8 $\pm$ 0.9       | -10.4 $\pm$ 4.9     | -7.6 $\pm$ 1.1       | -7.1 $\pm$ 1.6        |
| DoubleDunk    | -17.6 $\pm$ 1.5     | -14.0 $\pm$ 2.8      | -16.8 $\pm$ 2.9     | -14.1 $\pm$ 1.8      | -13.4 $\pm$ 4.9       |
| DemonAttack   | 162.0 $\pm$ 34.7    | 386.2 $\pm$ 75.3     | 183.2 $\pm$ 44.7    | 372.9 $\pm$ 81.7     | 570.3 $\pm$ 110.2     |

Table 4: Mean and standard deviation of returns per Atari game across 5 random seeds using 1% of replay dataset after 6.25M gradient steps. REM and CQL results are from [Kumar et al. \(2022\)](#).

| Game          | REM                  | CQL                  | AEVL                 | Fixed-CCVL           | CCVL                 |
|---------------|----------------------|----------------------|----------------------|----------------------|----------------------|
| Asterix       | 2317.0 $\pm$ 838.1   | 3318.5 $\pm$ 301.7   | 1958.9 $\pm$ 1050.2  | 3256.6 $\pm$ 395.1   | 5517.2 $\pm$ 1215.4  |
| Breakout      | 33.4 $\pm$ 4.0       | 166.0 $\pm$ 23.1     | 16.7 $\pm$ 5.6       | 150.3 $\pm$ 17.8     | 172.5 $\pm$ 35.6     |
| Pong          | -0.7 $\pm$ 9.9       | 17.9 $\pm$ 1.1       | -0.2 $\pm$ 4.7       | 17.6 $\pm$ 2.1       | 17.4 $\pm$ 2.8       |
| Seaquest      | 2753.6 $\pm$ 1119.7  | 2030.7 $\pm$ 822.8   | 2853.0 $\pm$ 1089.2  | 2112.5 $\pm$ 856.4   | 2746.0 $\pm$ 1544.2  |
| Qbert         | 7417.0 $\pm$ 2106.7  | 9605.6 $\pm$ 1593.5  | 5409.2 $\pm$ 3256.6  | 9750.7 $\pm$ 1366.8  | 10108.1 $\pm$ 2445.5 |
| SpaceInvaders | 443.5 $\pm$ 67.4     | 1214.6 $\pm$ 281.8   | 450.2 $\pm$ 101.3    | 1243.4 $\pm$ 269.8   | 1154.6 $\pm$ 302.1   |
| Zaxxon        | 1609.7 $\pm$ 1814.1  | 4250.1 $\pm$ 626.2   | 1678.2 $\pm$ 1425.6  | 4060.3 $\pm$ 673.1   | 6470.2 $\pm$ 1512.2  |
| YarsRevenge   | 16930.4 $\pm$ 2625.8 | 17124.7 $\pm$ 2125.6 | 17233.5 $\pm$ 2590.8 | 18040.5 $\pm$ 1545.9 | 19233.0 $\pm$ 1719.2 |
| RoadRunner    | 46601.6 $\pm$ 2617.2 | 38432.6 $\pm$ 1539.7 | 45035.2 $\pm$ 3823.0 | 37945.7 $\pm$ 1338.9 | 42780.5 $\pm$ 4112.3 |
| MsPacman      | 2303.1 $\pm$ 202.7   | 2790.6 $\pm$ 353.1   | 2148.8 $\pm$ 273.4   | 2501.5 $\pm$ 201.3   | 2680.4 $\pm$ 212.4   |
| BeamRider     | 674.8 $\pm$ 21.4     | 785.8 $\pm$ 43.5     | 662.9 $\pm$ 50.7     | 782.3 $\pm$ 34.9     | 780.1 $\pm$ 40.8     |
| Jamesbond     | 130.5 $\pm$ 45.7     | 96.8 $\pm$ 43.2      | 152.2 $\pm$ 58.2     | 112.3 $\pm$ 81.3     | 172.1 $\pm$ 153.9    |
| Enduro        | 1583.9 $\pm$ 108.7   | 938.5 $\pm$ 63.9     | 1602.7 $\pm$ 135.5   | 913.2 $\pm$ 50.3     | 1376.2 $\pm$ 203.8   |
| WizardOfWor   | 2661.6 $\pm$ 371.4   | 612.0 $\pm$ 343.3    | 1767.5 $\pm$ 462.1   | 707.4 $\pm$ 323.2    | 2723.1 $\pm$ 515.6   |
| IceHockey     | -6.5 $\pm$ 3.1       | -15.0 $\pm$ 0.7      | -9.1 $\pm$ 4.8       | -17.6 $\pm$ 1.0      | -10.2 $\pm$ 2.1      |
| DoubleDunk    | -17.6 $\pm$ 2.6      | -16.2 $\pm$ 1.7      | -19.4 $\pm$ 3.2      | -15.2 $\pm$ 0.9      | -9.8 $\pm$ 3.8       |
| DemonAttack   | 5602.3 $\pm$ 1855.5  | 8517.4 $\pm$ 1065.9  | 2455.3 $\pm$ 1765.0  | 8238.7 $\pm$ 1091.2  | 9730.0 $\pm$ 1550.7  |

Table 5: Mean and standard deviation of returns per Atari game across 5 random seeds using 5% of replay dataset after 12.5M gradient steps. REM and CQL results are from [Kumar et al. \(2022\)](#).

| Game          | REM                  | CQL                  | AEVL                 | Fixed-CCVL           | CCVL                 |
|---------------|----------------------|----------------------|----------------------|----------------------|----------------------|
| Asterix       | 5122.9 $\pm$ 328.9   | 3906.2 $\pm$ 521.3   | 7494.7 $\pm$ 380.3   | 3582.1 $\pm$ 327.5   | 7576.0 $\pm$ 360.2   |
| Breakout      | 96.8 $\pm$ 21.2      | 70.8 $\pm$ 5.5       | 97.1 $\pm$ 35.7      | 75.8 $\pm$ 6.1       | 121.4 $\pm$ 10.3     |
| Pong          | 7.6 $\pm$ 11.1       | 5.5 $\pm$ 6.2        | 7.1 $\pm$ 12.9       | 5.2 $\pm$ 6.0        | 13.4 $\pm$ 6.1       |
| Seaquest      | 981.3 $\pm$ 605.9    | 1313.0 $\pm$ 220.0   | 877.2 $\pm$ 750.1    | 1232.6 $\pm$ 379.3   | 1211.4 $\pm$ 437.2   |
| Qbert         | 4126.2 $\pm$ 495.7   | 5395.3 $\pm$ 1003.64 | 4713.6 $\pm$ 617.0   | 5105.5 $\pm$ 986.4   | 5590.9 $\pm$ 2111.4  |
| SpaceInvaders | 799.0 $\pm$ 28.3     | 938.1 $\pm$ 80.3     | 692.7 $\pm$ 101.9    | 860.5 $\pm$ 77.3     | 1233.4 $\pm$ 103.1   |
| Zaxxon        | 0.0 $\pm$ 0.0        | 836.8 $\pm$ 434.7    | 902.5 $\pm$ 895.2    | 904.1 $\pm$ 560.1    | 1212.2 $\pm$ 902.1   |
| YarsRevenge   | 11924.8 $\pm$ 2413.8 | 12413.9 $\pm$ 2869.7 | 12508.5 $\pm$ 1540.2 | 11587.2 $\pm$ 2676.8 | 12502.6 $\pm$ 2349.2 |
| RoadRunner    | 49129.4 $\pm$ 1887.9 | 45336.9 $\pm$ 1366.7 | 50152.9 $\pm$ 2208.9 | 44832.6 $\pm$ 1329.8 | 47972.1 $\pm$ 2991.3 |
| MsPacman      | 2268.8 $\pm$ 455.0   | 2427.5 $\pm$ 191.3   | 2515.5 $\pm$ 548.0   | 2115.3 $\pm$ 108.9   | 2015.7 $\pm$ 352.8   |
| BeamRider     | 4154.9 $\pm$ 357.2   | 3468.0 $\pm$ 238.0   | 4564.7 $\pm$ 578.4   | 3312.3 $\pm$ 247.3   | 3781.0 $\pm$ 401.8   |
| Jamesbond     | 149.3 $\pm$ 304.5    | 89.7 $\pm$ 15.6      | 127.6 $\pm$ 414.8    | 91.9 $\pm$ 20.2      | 152.8 $\pm$ 42.8     |
| Enduro        | 832.5 $\pm$ 65.5     | 1160.2 $\pm$ 81.5    | 959.2 $\pm$ 100.3    | 1204.6 $\pm$ 90.3    | 1585.0 $\pm$ 102.1   |
| WizardOfWor   | 920.0 $\pm$ 497.0    | 764.7 $\pm$ 250.0    | 1184.3 $\pm$ 588.9   | 749.3 $\pm$ 231.8    | 1429.9 $\pm$ 751.4   |
| IceHockey     | -5.9 $\pm$ 5.1       | -16.0 $\pm$ 1.3      | -5.2 $\pm$ 7.3       | -14.9 $\pm$ 2.5      | -4.1 $\pm$ 5.9       |
| DoubleDunk    | -19.5 $\pm$ 2.5      | -20.6 $\pm$ 1.0      | -19.2 $\pm$ 2.2      | -21.3 $\pm$ 1.7      | -24.6 $\pm$ 6.2      |
| DemonAttack   | 9674.7 $\pm$ 1600.6  | 7152.9 $\pm$ 723.2   | 10345.3 $\pm$ 1612.3 | 7416.8 $\pm$ 1598.7  | 12330.5 $\pm$ 1590.4 |

Table 6: Mean and standard deviation of returns per Atari game across 5 random seeds using initial 10% of replay dataset after 12.5M gradient steps. REM and CQL results are from [Kumar et al. \(2022\)](#).
